# Supplementary material
Source: PubMed Central journal article supplement (PMC6408904)
Supplement: rspb20182873supp1.pdf [file rspb20182873supp1.pdf]

## Electronic supplementary material for

### Sexual selection and ageing: interplay between pre- and post-copulatory traits senescence in the guppy

Clelia Gasparini , Alessandro Devigili & Andrea Pilastro

**Table S1.** Correlation matrix of pre- and post-copulatory traits measured in young (a) and old (b) males. Asterisks indicate significant correlations.

(a)

|                       | Brightness | Orange area | Iridescent area | Sperm velocity fresh | Sperm number fresh | Sperm velocity stored | Sperm number stored |
|-----------------------|------------|-------------|-----------------|----------------------|--------------------|-----------------------|---------------------|
| Brightness            | 1          |             |                 |                      |                    |                       |                     |
| Orange area           | -0.01      | 1           |                 |                      |                    |                       |                     |
| Iridescent area       | -0.12      | -0.36 *     | 1               |                      |                    |                       |                     |
| Sperm velocity fresh  | 0          | -0.03       | 0.13            | 1                    |                    |                       |                     |
| Sperm number fresh    | -0.15      | 0.13        | -0.23           | -0.26 *              | 1                  |                       |                     |
| Sperm velocity stored | 0.03       | -0.03       | 0.04            | 0.37 *               | -0.09              | 1                     |                     |
| Sperm number stored   | -0.34 *    | 0.16        | -0.13           | -0.11                | 0.53 *             | -0.05                 | 1                   |

(b)

|                       | Brightness | Orange area | Iridescent area | Sperm velocity fresh | Sperm number fresh | Sperm velocity stored | Sperm number stored |
|-----------------------|------------|-------------|-----------------|----------------------|--------------------|-----------------------|---------------------|
| Brightness            | 1          |             |                 |                      |                    |                       |                     |
| Orange area           | -0.06      | 1           |                 |                      |                    |                       |                     |
| Iridescent area       | -0.29      | 0.01        | 1               |                      |                    |                       |                     |
| Sperm velocity fresh  | 0.14       | 0.15        | -0.02           | 1                    |                    |                       |                     |
| Sperm number fresh    | -0.12      | 0.02        | 0.12            | 0.02                 | 1                  |                       |                     |
| Sperm velocity stored | 0.26       | -0.04       | -0.14           | 0.28                 | 0.19               | 1                     |                     |
| Sperm number stored   | -0.1       | -0.13       | -0.2            | 0.24                 | 0.35 *             | 0.47 *                | 1                   |

**Table S2.** Senescence of pre- and post-copulatory traits. Senescence of traits between young and old males (reported as old – young trait values), traits that were significantly different are reported in bold. Colours are reported relative to body area. P-values were obtained using separated paired t-tests for each trait and are reported after correction for multiple comparisons (false discovery rate, FDR). Sperm number is reported  $\times 10^6$ .

| Trait                   | Mean difference % | Mean difference ( $\pm$ SE) | CI            | Young (mean $\pm$ SE) | Old (mean $\pm$ SE) | N  | t     | adjusted p       | direction |
|-------------------------|-------------------|-----------------------------|---------------|-----------------------|---------------------|----|-------|------------------|-----------|
| Body size (SL)          | 0.90              | 0.139 $\pm$ 0.06            | 0.02; 0.25    | 16.15 $\pm$ 0.09      | 16.34 $\pm$ 0.10    | 48 | 2.364 | <b>0.037</b>     | increase  |
| Orange area             | -19.46            | -1.866 $\pm$ 0.40           | -2.67; -1.06  | 8.44 $\pm$ 0.37       | 3.03 $\pm$ 0.42     | 45 | 4.679 | <b>&lt;0.001</b> | decrease  |
| Orange brightness       | -21.65            | -0.987 $\pm$ 0.23           | -1.46; -0.51  | 4.10 $\pm$ 0.11       | 3.03 $\pm$ 0.21     | 48 | 4.203 | <b>&lt;0.001</b> | decrease  |
| Iridescent area         | -27.92            | -4.591 $\pm$ 0.75           | -6.11; -3.07  | 13.75 $\pm$ 0.39      | 9.71 $\pm$ 0.58     | 45 | 6.102 | <b>&lt;0.001</b> | decrease  |
| Sperm number *          | -9.97             | -0.900 $\pm$ 0.44           | -1.79; -0.01  | 7.17 $\pm$ 0.26       | 6.47 $\pm$ 0.45     | 47 | 2.037 | 0.067            | NS        |
| Sperm velocity *        | -2.56             | -3.969 $\pm$ 2.10           | -8.19; 0.25   | 129.26 $\pm$ 1.12     | 124.97 $\pm$ 0.45   | 47 | 1.891 | 0.081            | NS        |
| Sperm number (fresh)    | -3.17             | -0.281 $\pm$ 0.47           | -1.23; 0.67   | 4.89 $\pm$ 0.21       | 4.70 $\pm$ 0.49     | 42 | 0.597 | 0.616            | NS        |
| Sperm number (stored)   | -12.67            | -1.792 $\pm$ 0.64           | -3.09; -0.50  | 9.53 $\pm$ 0.38       | 8.29 $\pm$ 0.59     | 43 | 2.793 | <b>0.016</b>     | decrease  |
| Sperm velocity (fresh)  | -5.96             | -8.975 $\pm$ 2.51           | -14.03; -3.90 | 136.21 $\pm$ 1.31     | 128.34 $\pm$ 1.90   | 43 | 3.576 | <b>0.002</b>     | decrease  |
| Sperm velocity (stored) | 0.72              | -0.169 $\pm$ 2.66           | -5.53; 5.19   | 122.32 $\pm$ 1.39     | 120.41 $\pm$ 1.97   | 44 | 0.064 | 0.950            | NS        |

\* average between fresh and stored sperm

**Table S3.** Cohen's d effect sizes (difference/ $SD_{diff}$ ) with their standard errors. Positive and negative effect size values indicate an increased and a decreased phenotypic value in old males, respectively. Standard errors were calculated using a bootstrap procedure (10,000 iterations), using PopTools in Excel [1]. *P* values were derived from the proportion of bootstrapped values that were greater or smaller than 0, according to whether the corresponding Cohen's d value was positive or negative. Effect sizes' standard errors correspond to the standard deviation of the bootstrapped distribution. Both pre- and post-copulatory traits had significantly negative Cohens' d values, but mean effect size was significantly larger (in absolute value) for pre-copulatory traits.

|                                                                                            | Cohen's d | SE    | <i>p</i> <sup>(a)</sup> |
|--------------------------------------------------------------------------------------------|-----------|-------|-------------------------|
| Body size                                                                                  | 0.342     | 0.132 | 0.0060                  |
| Orange brightness                                                                          | -0.640    | 0.210 | 0.0000                  |
| Orange area                                                                                | -0.712    | 0.142 | 0.0000                  |
| Iridescent area                                                                            | -0.936    | 0.194 | 0.0000                  |
| Sperm velocity                                                                             | -0.272    | 0.151 | 0.0330                  |
| Sperm number                                                                               | -0.339    | 0.173 | 0.0156                  |
| Mean pre-copulatory traits <sup>(b)</sup>                                                  | -0.762    | 0.106 | 0.0000                  |
| Mean post-copulatory traits <sup>(c)</sup>                                                 | -0.305    | 0.115 | 0.0026                  |
| Difference between the mean effect sizes of pre- and post-copulatory traits <sup>(d)</sup> | 0.457     | 0.157 | 0.0024                  |

(a) represents the probability that Cohen's d is different from 0;

(b) average Cohen's d for brightness, orange and iridescent;

(c) average Cohen's d for sperm velocity and sperm number;

(d) difference between pre- and post-copulatory mean Cohen's d values.

**Figure S1.** A visual representation of the relative importance (see statistical analysis for details) of the various model terms that predict lifespan according to investment in pre- and post-copulatory traits across all models.

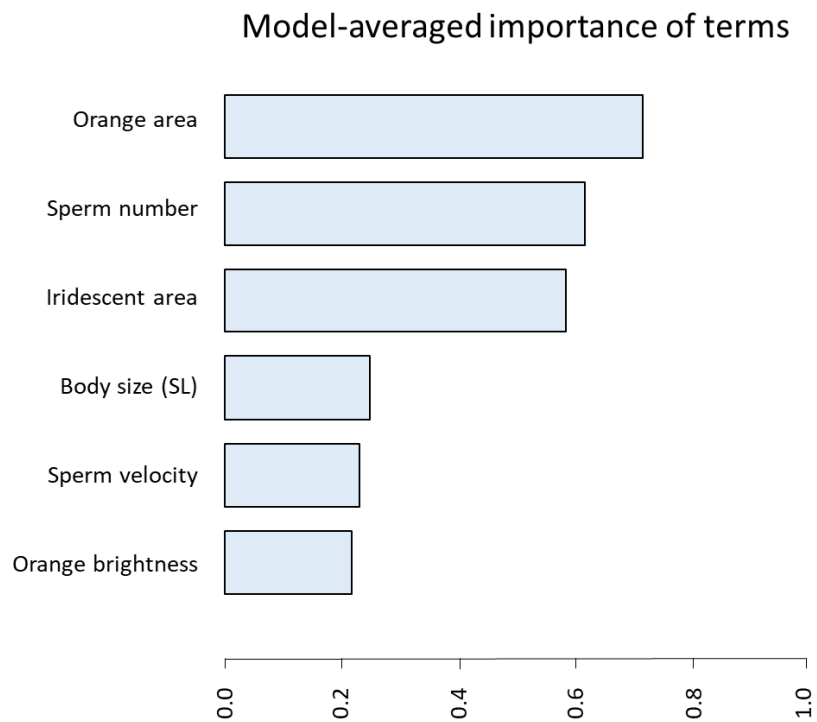

## SUPPLEMENTARY METHODS

### Measurements of orange brightness

The method we used circumvents the common problem of light reflectance on the body surface that may interfere with the assessment of the area, but most importantly with the spectral properties of the coloured spots. Briefly, each male was placed in a small tank (20x7x20 cm), lit by overhead circular fluorescence lamp (Circolux EL 24W, Osram), that limited excessive wandering of the fish. Once the male was acclimatised (usually within 1 minute), a net made of transparent acrylic was used to briefly confine the male close to the front glass of the tank, so that his left side could be photographed (using a Canon EOS 450D camera mounting a Canon EF-S 60-mm Macro USM lens). A ruler and a simulated Gretag Macbeth Pantone were included in each image to provide a reference for size and colour calibration. Spectral properties of orange spots were estimated using the software ColourWorker (<http://colourworker.com/index.html>) with orange (guppy-specific) spectra used as reference [2, 3]. For each male the largest orange spot was chosen, and the spectral data obtained used to calculate an index of brightness (the area under the reflectance spectrum), with low values indicating a dull orange spot [see 3].

### References:

1. Hood G.M. 2011 *PopTools version 3.2.5*, Available on the internet. URL <http://www.poptools.org>.
2. Rahman M.M., Kelley J.L., Evans J.P. 2013 Condition-dependent expression of pre- and postcopulatory sexual traits in guppies. *Ecology and Evolution* **3**(7), 2197–2213.
3. Gasparini C., Kelley J.L., Evans J.P. 2014 Male sperm storage compromises sperm motility in guppies. *Biol Lett* **10**(11).
